# Supplementary material for: Binuclear alkynylplatinum(ii) terpyridine complexes with flexible bridges behave as organogelators for several organic solvents
Source: Royal Society of Chemistry journal article supplement (doi:10.1039/c7ra00208d), 2017-01-01
Supplement: c7ra00208d1.pdf [file c7ra00208d1.pdf]

**Binuclear Alkynylplatinum(II) Terpyridine Complexes with Flexible  
Bridges Behave as Organogelators for Several Organic Solvents**

Ling-Bao Xing,<sup>a,b\*</sup> Fei Qiao,<sup>b</sup> Zhao Yuan,<sup>b</sup> Jing-Li Zhang,<sup>b</sup> Rui-Ying Zhang<sup>b</sup>,  
Shuping Zhuo,<sup>b</sup> Zi-Yan Zhou<sup>b</sup>

<sup>a</sup>Key Laboratory of Colloid and Interface Chemistry & Key Laboratory of Special  
Aggregated Materials, Ministry of Education, Shandong University, Jinan 250100,  
China. E-mail: lbxing@sdut.edu.cn

<sup>b</sup>School of Chemical Engineering, Shandong University of Technology, Zibo 255049,  
P. R. China.

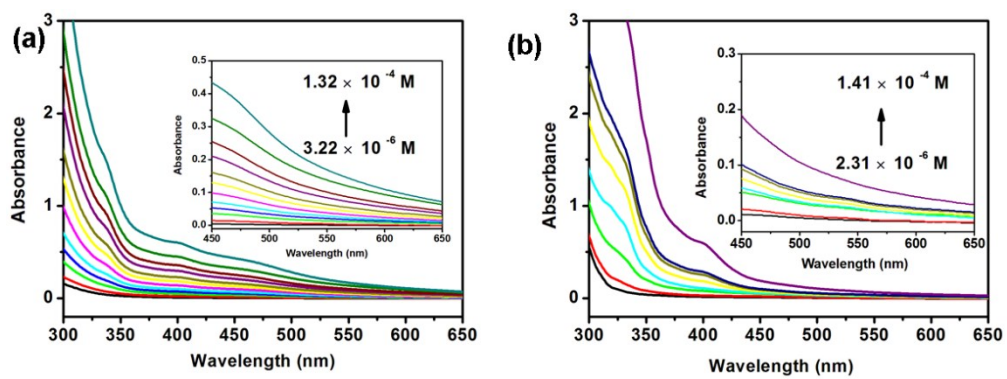

**Fig. S1** UV-vis absorption spectral changes of **1a** (a) and **1b** (b) in different concentration.

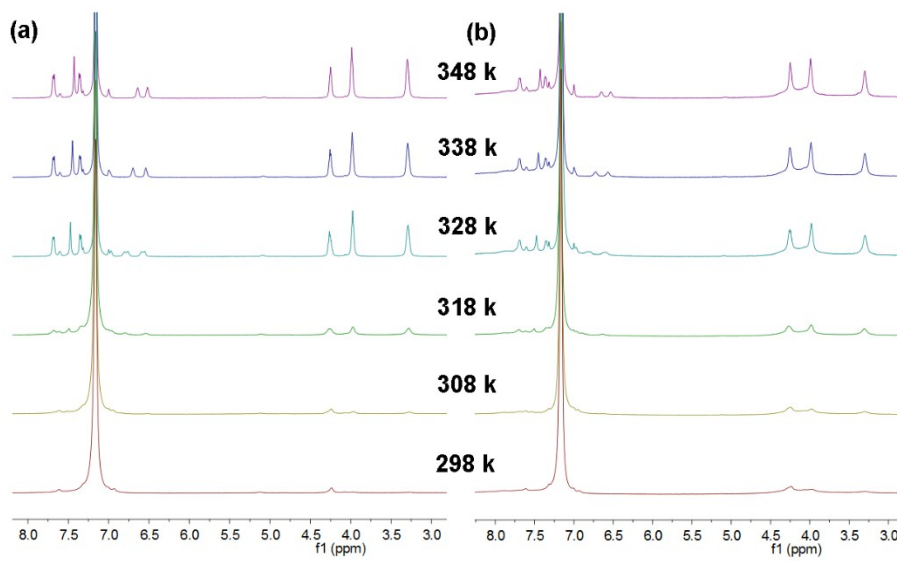

**Fig. S2** Partial temperature-dependent <sup>1</sup>H NMR spectra (300MHz) of **1a** (a) and **1b** (b) in benzene-*d*<sub>6</sub>.
